# Supplementary material
Source: publisher site journal article supplement (https://www.dovepress.com/article/436392)
Supplement: Supplementary file 1 [file get_supplementary_file.php]

## Supplemental Material

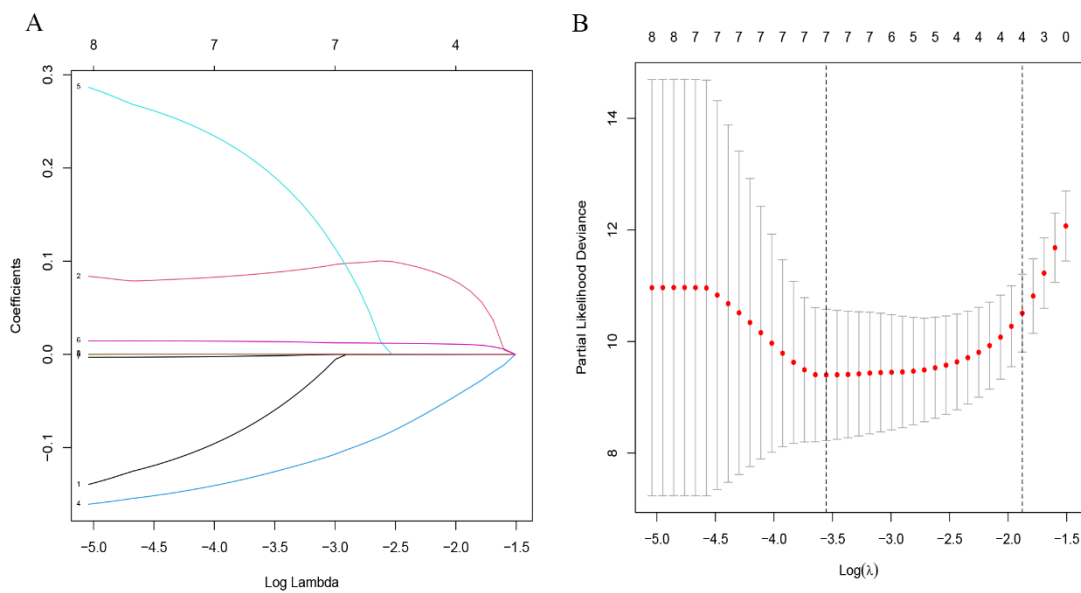

**Supplementary Figure 1:** Construction of the INPS using LASSO Cox regression model. (A) LASSO coefficient profiles of the inflammatory- nutritional biomarkers. (B) Ten-fold cross validation for tuning parameter selection in the LASSO model. The dotted vertical lines were drawn at the optimal values by minimum criteria and 1-SE criteria. Herein, we choose the minimum criteria.

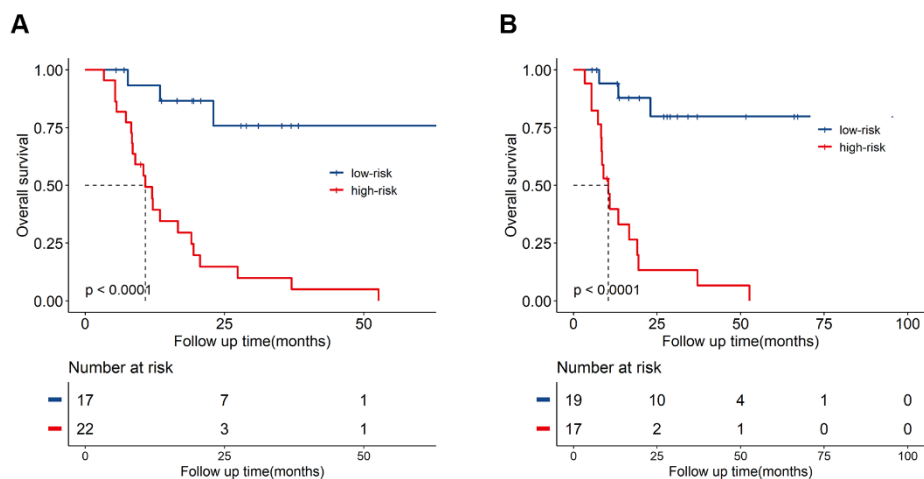

**Supplementary Figure 2:** Overall survival curves obtained with Kaplan-Meier analysis between different INPS groups in high-risk group among the training cohort. (A) Survival curves in the high-risk IPI group. (B) Survival curves in the high-risk NCCN-IPI group.

**Abbreviations:** INPS, inflammatory-nutritional prognostic scoring; IPI, International Prognostic Index; NCCN, National Comprehensive Cancer Network.
